# Supplementary material for: Using host‐associated differentiation to track source population and dispersal distance among insect vectors of plant pathogens
Source: PubMed Central journal article supplement (PMC6439873; doi:10.1111/eva.12733), 2019-02-12

$$\text{DeltaK} = \text{mean}(|L''(K)|) / \text{sd}(L(K))$$

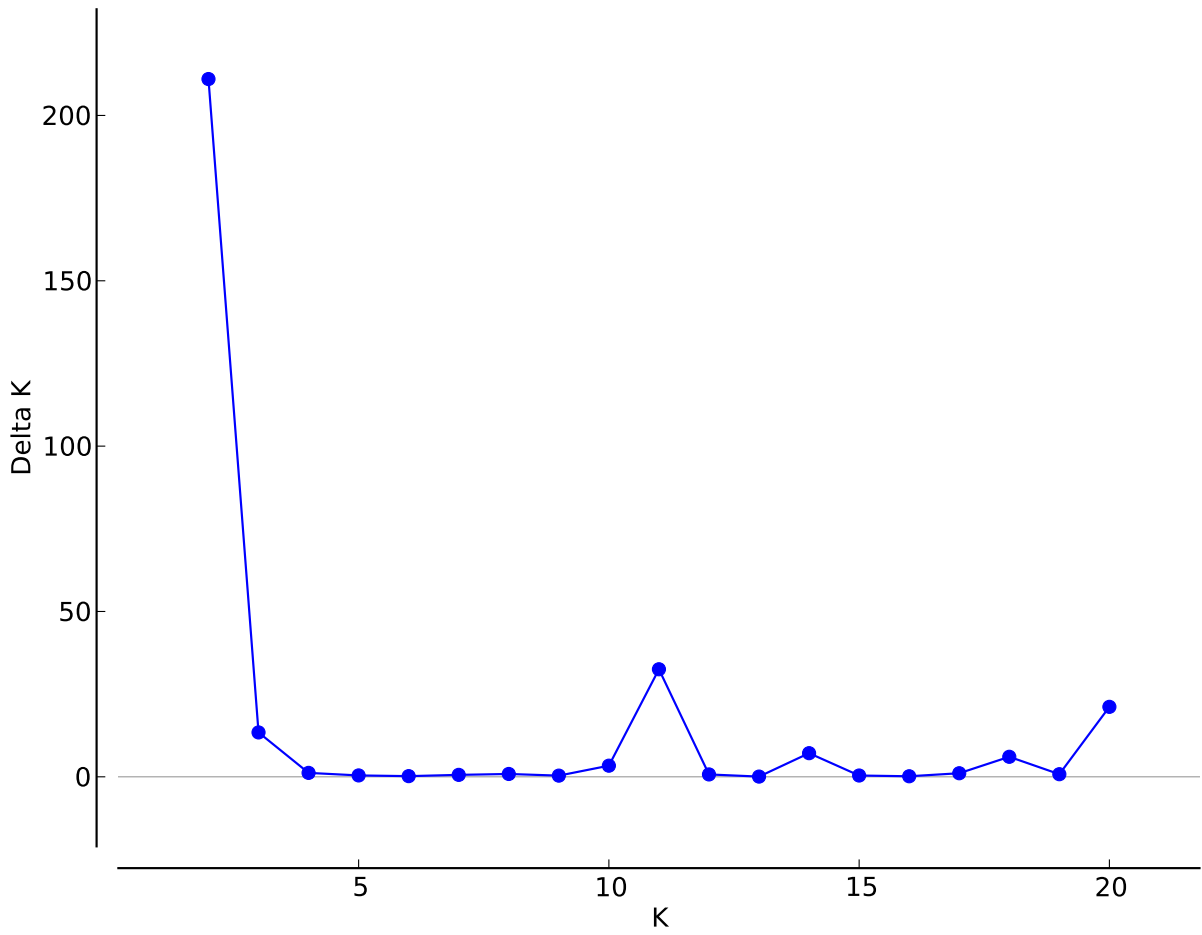

Supplement: EVA-12-692-s002.pdf [file EVA-12-692-s002.pdf]
